# Supplementary material
Source: Springer Nature journal article supplement (https://www.springermedizin.de/resource/supplementary/12891_2011_1341_MOESM1_ESM.pdf/9508036)
Supplement: MOESM1 [file 9508036]

Primary and Acute  
Ankle Sprain

Inclusion

-

Standard treatment  
(pressure bandage, tape)

Informed  
consent

no

+

yes

Randomization  
(n = 180)

Purely Functional  
(n = 60)

Tape  
(n = 60)

Brace  
(n = 60)

Exercise Schedule

Follow Up

Outcomes measured on the following scoring moments:

- after 5-7 days: VAS pain, Karlsson, FAOS
- after 6 weeks: VAS pain, Karlsson, FAOS, recurrences
- after 6 months: VAS pain, Karlsson, VAS satisfaction, recurrences
- after 1 year: VAS pain, Karlsson, FAOS, VAS satisfaction, recurrences
